# Supplementary material for: From citrus waste to value: optimizing sulfonated carbons for limonene upcycling into value-added products
Source: Royal Society of Chemistry journal article supplement (doi:10.1039/d4su00348a), 2024-12-12
Supplement: d4su00348a2.pdf [file d4su00348a2.pdf]

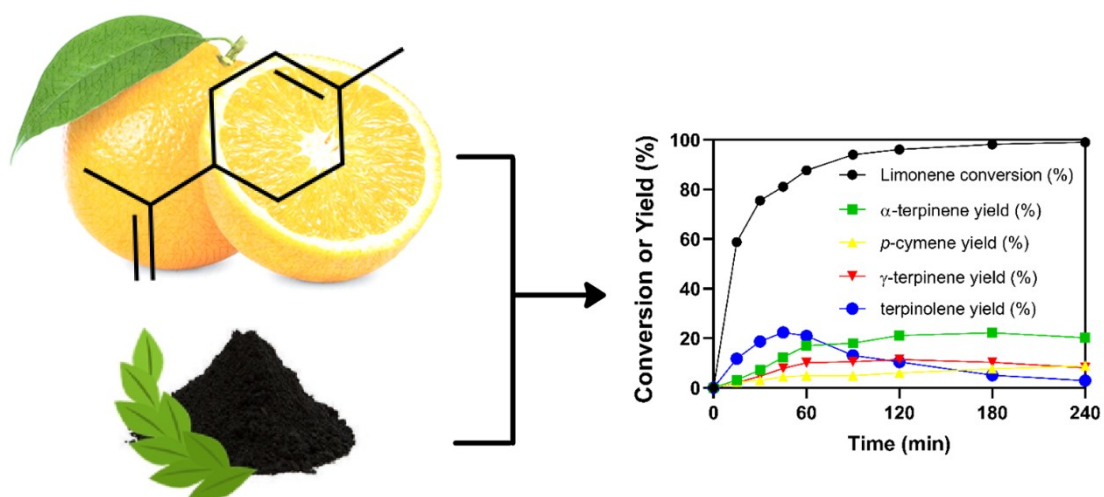

Sulfonated carbons facilitate the eco-friendly transformation of limonene into valuable compounds, representing a noteworthy advancement in the field of catalysis.
